# Supplementary material
Source: Elsevier journal article supplement (https://www.sciencedirect.com/science/article/pii/S0001651921001187)
Supplement: mmc1 [file S0001651921001187:mmc1.doc]

**Supplementary table**

**Table 1. Demographics for patients with sudden sensorineural hearing loss consulting at the otorhinolaryngology department.**

| **Patients** | **No. (%)** |
| --- | --- |
| Total | 211 |
| Gender |  |
| Male | 101 (47.9) |
| Female | 110 (52.1) |
| Age |  |
| Mean ± SD | 47.8 ± 17 |
| Median | 49 |
| Range | 6 - 86 |
| Cardiovascular |  |
| Hypertension | 58 (25.4) |
| Diabetes Mellitus | 27 (11.8) |
| History of stroke | 4 (1.8) |
| Autoimmune disease | 7 (3.1) |
| Hypothyroidism | 28 (12.3) |
|  |  |
| **Clinical presentation** |  |
| Hearing loss only | 42 (19.9) |
| Tinnitus only | 3 (1.4) |
| Hearing loss + tinnitus | 103 (48.8) |
| Hearing loss or tinnitus + vertigo or dizziness | 62 (30.8) |
|  |  |
| **Treatment** |  |
| Steroids PO | 78 (37) |
| Prednisone PO | 76 |
| Methylprednisolone PO | 2 |
| Transtympanic steroid injection (TSI) only | 31 (14.7) |
| Steroids PO + TSI | 94 (44.5) |
| Prednisone PO + TSI | 88 |
| Methylprednisolone PO + TSI | 4 |
| Betamethasone PO + TSI | 1 |
| Deflazacort PO + TSI | 1 |
| No treatment | 8 (3.8) |
